# Supplementary material
Source: ML conference proceedings conference paper supplement (https://openreview.net/forum?id=52HyCgZrgv)
Supplement: supplementary_material [file Region_Aware_Reconstruction_Paper.pdf › Region_Aware_Masking_NeuroSTORM/Region_Aware_Masking_NeuroSTORM/NeuroSTORM/Region_Aware_Reconstruction_Paper.pdf]

---

# Region-Aware Reconstruction Strategy for Pre-training fMRI Foundation Model

---

Anonymous Author(s)

Affiliation

Address

email

## Abstract

1 The emergence of foundation models in neuroimaging is driven by the increasing  
2 availability of large-scale and heterogeneous brain imaging datasets. Recent ad-  
3 vances in self-supervised learning, particularly reconstruction-based objectives,  
4 have demonstrated strong potential for pre-training models that generalize effec-  
5 tively across diverse downstream functional MRI (fMRI) tasks. In this study, we  
6 explore region-aware reconstruction strategies for foundation models in resting-  
7 state fMRI, moving beyond approaches that rely on random region masking. Our  
8 analysis emphasizes the importance of spatial dependencies in fMRI signals, mo-  
9 tivating a reconstruction framework that integrates anatomical priors into the  
10 masking process. Specifically, we introduce an ROI-guided masking strategy based  
11 on the Automated anatomical labelling atlas 3 (AAL3) atlas, applied directly to  
12 full 4D fMRI volumes to selectively mask semantically coherent brain regions  
13 during self-supervised pretraining. Using the ADHD-200 dataset comprising 973  
14 subjects with resting-state fMRI scans, we show that our method achieves a 4.23%  
15 improvement in classification accuracy compared to conventional random masking.  
16 Region-level attribution analysis reveals that brain volumes within the limbic region  
17 and cerebellum contribute most significantly to reconstruction fidelity and model  
18 representation. Our results demonstrate that embedding anatomical priors into  
19 foundation model pretraining not only enhances interpretability but also yields  
20 more robust and discriminative representations. In future work, we plan to extend  
21 this approach by evaluating it on additional neuroimaging datasets, and developing  
22 new loss functions explicitly derived from region-aware reconstruction objectives.  
23 These directions aim to further improve the robustness and interpretability of  
24 foundation models for functional neuroimaging.

## 1 Introduction

26 Functional Magnetic Resonance Imaging (fMRI) is a non-invasive technique that measures brain  
27 activity through the blood-oxygen-level dependent (BOLD) signal. It has been widely used to study  
28 brain organization, functional connectivity, and cognitive processes, as well as in clinical contexts  
29 such as diagnosis and treatment planning for neurological disorders. However, analyzing fMRI  
30 data remains challenging due to its high dimensionality, inter-subject variability, and heterogeneous  
31 acquisition protocols, which hinder reproducibility and generalization. The increasing availability of  
32 large and heterogeneous neuroimaging datasets has motivated the development of foundation models  
33 designed to learn generalizable representations across populations and tasks.

34 Recent efforts in developing foundation models for fMRI have demonstrated the potential of  
35 large-scale pretraining to capture generalizable neural representations. Examples include Swin 4D  
36 fMRI Transformer (SwiFT) [1], which introduces a transformer-based architecture for 4D fMRI data,

and a graph transformer-based foundation model for functional connectivity networks [2], which integrates graph neural networks (GNNs) with transformer attention [3] mechanisms to effectively capture connectivity patterns in brain networks. Within this paradigm, self-supervised learning has emerged as a particularly promising direction for harnessing large amounts of unlabeled data. Reconstruction-based approaches such as masked autoencoders (MAEs) [4] mask parts of the input and train the model to recover them, thereby learning context-aware and transferable representations. Early demonstrations in other neuroimaging domains, such as EEG, have shown the utility of self-supervised approaches for seizure detection [5], with subsequent extensions [6] incorporating random noise injection or single-channel removal to improve representation learning and robustness. In the fMRI domain, recent models such as BrainLM [7], Brain-JEPA [8], and Self-Supervised Pre-training Tasks for fMRI Time-series [9] adopt masking to capture spatiotemporal dynamics. While effective, these approaches typically apply masking after voxel signals are averaged into ROI-level time series through parcellation, sacrificing fine-grained spatial information and limiting localized reconstruction fidelity. In contrast, NeuroSTORM [10] applies masking directly on full-resolution 4D fMRI volumes, but does not incorporate region-aware masking.

In this paper, we propose a region-aware reconstruction strategy for fMRI foundation model pre-training. Our framework integrates anatomical regions directly in the masking process by using the Automated Anatomical Labeling atlas version 3 (AAL3) [11] to selectively mask brain regions within full-resolution 4D fMRI volumes. This preserves voxel-level spatial fidelity while encouraging the model to reconstruct localized and functionally meaningful signals. Evaluating on the ADHD-200 dataset [12], we demonstrate that ROI-guided masking improves classification accuracy compared to conventional random masking. Furthermore, in line with prior ADHD literature implicating the limbic regions [13, 14] and cerebellum [15] in attentional control, we find that these regions play an important role in reconstruction fidelity.

## 2 Methods

### 2.1 Self-supervised Pre-training Framework

Our self-supervised learning framework follows a two-stage process: a pretraining phase focused on masked voxel reconstruction, and a fine-tuning phase for prediction tasks. We adopt NeuroSTORM [10] as the foundational model for fMRI, leveraging its encoder-decoder architecture for representation learning.

In the pretraining stage, we introduce a region-of-interest (ROI) based masking strategy to improve the spatial specificity of self-supervised learning. Rather than applying random masking uniformly across space or time, we selectively mask spatiotemporal segments corresponding to anatomical or functional ROIs. This encourages the model to focus on reconstructing meaningful brain dynamics within targeted regions, thereby enhancing its ability to learn localized and functionally relevant features. The model is trained to reconstruct the masked segments of the input sequence without relying on supervision, enabling robust spatiotemporal representation learning. During the fine-tuning stage, we freeze the pretrained encoder weights and train a lightweight output head on top of the fixed representations, optimized for prediction tasks. By decoupling self-supervised representation learning from supervised classification and integrating ROI-guided masking during pretraining, our framework improves both generalization and interpretability in fMRI-based applications.

#### 2.1.1 ROI-Based Masking

Using the AAL3 atlas, we identify predefined anatomical regions and selectively mask a subset of these ROIs in the input 4D volume. This ROI-based masking extends the NeuroSTORM masking pipeline, which originally supports three masking strategies: random, random (randomly selected voxels in both space and time), random, tube (random spatial voxels masked consistently across all time points), and window, random (contiguous 3D spatial blocks with randomly masked time points). In our ROI-guided approach, the temporal masking dimension is equivalent to the tube setting, since we mask the same anatomical regions throughout the entire sequence.

We train the model using targeted masking of regions within major anatomical domains, including the frontal, temporal, parietal, occipital lobes, cerebellum, limbic regions and subcortical structures. The proportion of brain volume masked varied substantially across ROI-based strategies, with

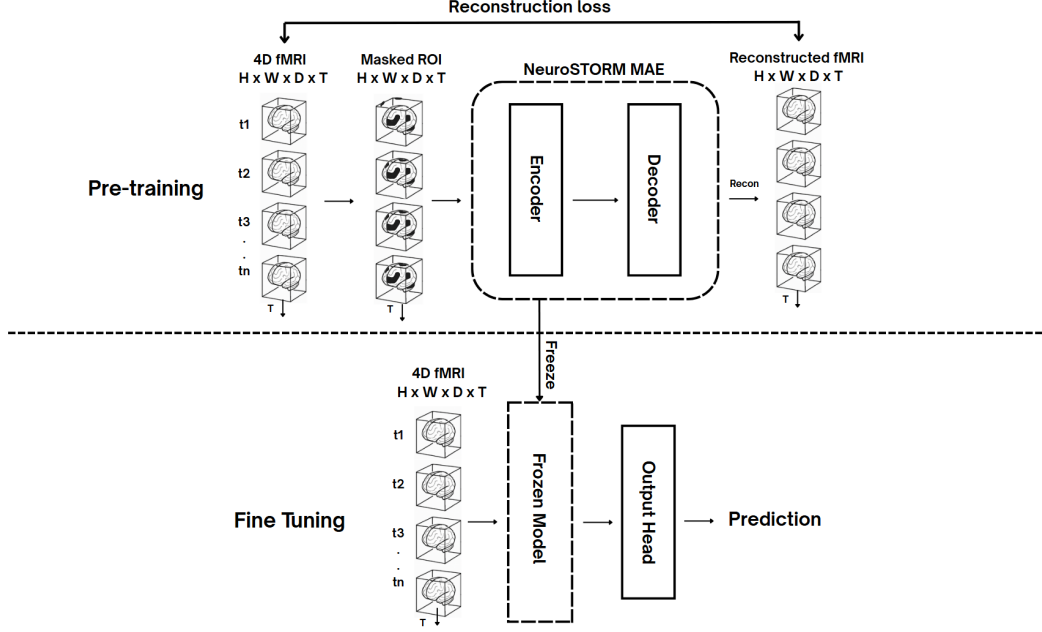

Figure 1: Illustration of ROI-guided masking strategy using AAL3 atlas. Specific anatomical regions are selectively masked during self-supervised pretraining.

regions defined according to the AAL3 atlas. Larger anatomical domains such as the frontal lobe (29.06% of total brain voxels) and parietal lobe (16.65%) masked a considerable portion of the signal, while smaller regions like the limbic regions (6.83%) and Subcortical structures (3.86%) involved proportionally less masking. In contrast, all of the existing NeuroSTORM masking strategies can include both brain and non-brain voxels, even though the overall proportion of the input masked is fixed at 10%.

Table 1: Mask ratios for selected anatomical regions, defined according to the AAL3 atlas. The number of voxels masked and the corresponding percentage of total brain voxels are shown for each region.

| Mask                   | Number of voxels masked | Percentage of brain masked |
|------------------------|-------------------------|----------------------------|
| Frontal lobe           | 53,985                  | 29.06%                     |
| Parietal lobe          | 30,927                  | 16.65%                     |
| Temporal lobe          | 26,584                  | 14.31%                     |
| Occipital lobe         | 26,358                  | 14.19%                     |
| Cerebellum             | 24,414                  | 13.14%                     |
| Limbic regions         | 12,690                  | 6.83%                      |
| Subcortical structures | 7,165                   | 3.86%                      |

## 2.2 Model Architecture: NeuroSTORM

For fMRI analysis, we utilize NeuroSTORM (Neuroimaging Foundation Model with Spatial-Temporal Optimized Representation Modeling) [10], a state-of-the-art foundation model designed to learn directly from full 4D fMRI volumes. NeuroSTORM is pre-trained on over 28 million fMRI frames collected from more than 50,000 subjects, encompassing a broad demographic and clinical range across datasets such as UK Biobank [16], ABCD [17], and HCP [18]. This large-scale, multi-institutional corpus enables the model to generalize effectively across diverse downstream neuroimaging tasks. The model architecture is built upon a Shifted-Window Mamba (SWM) backbone, which integrates linear-time state-space modeling [19] with shifted spatial window attention [20] to efficiently capture both local and global patterns in high-dimensional fMRI data. During self-

105 supervised pretraining, NeuroSTORM adopts a masked autoencoding framework in which specific  
106 regions of the input are masked and reconstructed to facilitate robust representation learning. The  
107 masking strategies encourage the model to learn generalizable, context-aware features from brain  
108 activity.

### 109 3 Dataset Description and Pre-processing

110 We utilize the publicly available ADHD-200 dataset, which contains resting-state fMRI and phe-  
111 notypic data from both typically developing controls and individuals diagnosed with Attention-  
112 Deficit/Hyperactivity Disorder (ADHD). The data is sourced from multiple sites and includes hetero-  
113 geneous acquisition protocols, making it a valuable benchmark for evaluating the generalizability of  
114 models across diverse scanner conditions and subject populations. This dataset includes a total of  
115 973 participants between the ages of 7 and 21 years. This diverse demographic and clinical profile,  
116 collected across eight independent imaging sites, makes the ADHD-200 dataset a robust benchmark  
117 for evaluating model generalization across varying subject populations and acquisition conditions.

118 To ensure consistency across subjects and acquisition sites, we adopt a standardized fMRI pre-  
119 processing pipeline. All fMRI volumes are registered to the Montreal Neurological Institute (MNI152)  
120 template space, providing a common anatomical reference. Each volume is then resampled to an  
121 isotropic voxel resolution of  $2\text{ mm} \times 2\text{ mm} \times 2\text{ mm}$  to enforce spatial consistency. To standardize  
122 input dimensions across samples, all 3D volumes are cropped or padded to a fixed spatial shape of  $96$   
123  $\times 96 \times 96$ . Temporal normalization is performed by resampling time series to a uniform repetition  
124 time (TR) of 0.8 seconds using linear interpolation. The resulting 4D volumes are then z-score  
125 normalized across non-background voxels and stored as per-frame tensors to support efficient loading  
126 in different tasks. For anatomical reference, the AAL3 atlas is also resampled and aligned to match  
127 the fMRI volumes.

### 128 4 Experimental Settings

129 We conducted self-supervised pretraining experiments on the publicly available ADHD200 dataset,  
130 comprising 973 subjects. The data was split into training, validation, and test sets using an 8:1:1 ratio.  
131 Pretraining was performed for 20 epochs with a batch size of 24, using a model with approximately  
132 7.7 million parameters. The optimization was performed using the AdamW optimizer with a learning  
133 rate of  $5e-5$ . Reconstruction loss was computed using mean squared error (MSE) between the masked  
134 and predicted fMRI volumes, and all experiments were run on a high-performance computing cluster  
135 equipped with 3\*NVIDIA A100-SXM4-80GB GPUs. During training, each GPU utilized up to 60  
136 GB of memory, with utilization reaching 70–80%, indicating efficient use of computational resources.  
137 On this setup, pretraining required approximately 14–16 hours to complete, while fine-tuning took  
138 approximately 2 hours to run.

### 139 5 Results

140 During pretraining, we observed distinct differences in mean squared error (MSE) across different  
141 masking strategies. Random tube masking yielded the lowest MSE (0.0311), significantly lower than  
142 ROI-based masking approaches such as Frontal (0.0759), Temporal (0.0699), Cerebellum (0.0601),  
143 and Parietal (0.0860). This discrepancy can be attributed to the nature of the random masking  
144 strategy, which often includes non-brain regions (e.g., background voxels) in the masked input. These  
145 non-brain regions typically exhibit low or zero signal and are thus easier to reconstruct, leading to  
146 artificially low reconstruction errors. In contrast, ROI-based masking restricts the masked areas  
147 to anatomically defined brain regions, ensuring that the model focuses solely on reconstructing  
148 meaningful neural signals. Although this results in higher MSE values, it reflects a more accurate  
149 and robust assessment of the model’s ability to reconstruct functionally relevant brain activity. It is  
150 also important to note that the MSE values across different ROIs are not directly comparable due to  
151 inherent size differences among regions, which can influence the reconstruction loss.

152 Our experiments revealed clear differences in reconstruction and classification performance across  
153 masking strategies. Although random tube masking achieved the lowest reconstruction error (MSE =  
154 0.0311). Despite this, ROI-based pretraining yielded competitive or superior classification accuracy

Table 2: Reconstruction loss and ADHD classification performance (Accuracy and AUCROC) under existing masking strategies.

| Spatial Mask | Time Mask | Reconstruction loss | ACC           | AUCROC       |
|--------------|-----------|---------------------|---------------|--------------|
| Random       | Random    | 0.0263              | 62.76%        | 0.678        |
| Window       | Random    | 0.0322              | 62.76%        | 0.651        |
| Random       | Tube      | 0.0311              | <b>63.82%</b> | <b>0.680</b> |

Table 3: Reconstruction loss and ADHD classification performance (ACC and AUCROC) under atlas-based masking strategies. Each row corresponds to masking all voxels within the specified AAL3 anatomical region. For all atlas-based experiments, the time mask is fixed to *tube*. \*Note that MSE values across different ROIs are not directly comparable, since the number of voxels masked varies by region. Larger regions involve masking more voxels, which leads to higher reconstruction loss, whereas smaller regions mask fewer voxels and yield lower losses.

| Atlas Region Masked           | Reconstruction loss* | ACC           | AUCROC       |
|-------------------------------|----------------------|---------------|--------------|
| Frontal lobe                  | 0.0759               | 65.95%        | 0.671        |
| Parietal lobe                 | 0.0860               | 64.89%        | 0.716        |
| Temporal lobe                 | 0.0699               | 64.84%        | 0.691        |
| Occipital lobe                | 0.0893               | 64.89%        | 0.658        |
| Cerebellum                    | 0.0601               | 68.05%        | 0.720        |
| Limbic regions                | 0.0455               | <b>68.08%</b> | <b>0.752</b> |
| Subcortical structures        | 0.0482               | 67.02%        | 0.685        |
| Frontal lobe + Cerebellum     | 0.0683               | 65.95%        | 0.711        |
| Cerebellum + Limbic regions   | 0.0552               | 68.08%        | 0.711        |
| Limbic regions + Frontal lobe | 0.0742               | 65.42%        | 0.698        |

(ACC) and AUCROC compared to random masking. Notably, cerebellum and limbic masking substantially improved both ACC (68.05%, 68.08% respectively) and AUCROC (0.720, 0.704 respectively) relative to random tube masking (63.82% ACC, 0.680 AUCROC). These results indicate that masking anatomical regions during pre-training encourages the model to learn more discriminative and functionally relevant representations, even at the expense of higher reconstruction error. In addition to single-region masking, we also evaluated binary region combinations (frontal lobe + cerebellum, limbic regions + cerebellum, limbic regions + frontal lobe), whose results are summarized in Table 3.

## 6 Conclusion

In this work, we introduced a region-aware reconstruction strategy for fMRI foundation model pretraining by extending the NeuroSTORM framework with ROI-guided masking based on the AAL3 atlas. Our ROI-guided masking strategy achieved a 4.23% improvement in classification accuracy compared to conventional random masking, with single-region experiments showing that cerebellum and limbic regions were particularly effective. Extending this approach to binary region masking further highlighted the benefit of modeling inter-regional dependencies, where the limbic + cerebellum combination achieved the best performance. These results demonstrate that incorporating anatomical structure into the masking process enhances the model performance.

### 6.1 Limitations and Future Directions

Our study is limited to the ADHD-200 dataset, and in future work we plan to evaluate the approach on larger and more diverse datasets to more rigorously assess generalizability. We also aim to design region-aware loss functions that explicitly incorporate anatomical structure, moving beyond generic reconstruction objectives. In addition, we plan to investigate the impact of ROI-guided masking across a wider range of tasks and explore adaptive, data-driven masking strategies that dynamically select informative regions during pretraining.

## References

- [1] Peter Yongho Kim, Junbeom Kwon, Sunghwan Joo, Sangyoon Bae, Donggyu Lee, Yoonho Jung, Shinjae Yoo, Jiook Cha, and Taesup Moon. Swift: Swin 4d fmri transformer, 2023. URL <https://arxiv.org/abs/2307.05916>.
- [2] Yulong Wang, Vince D Calhoun, Godfrey D Pearlson, Peter Kochunov, Theo G.M. van Erp, and Yuhui Du. A graph transformer-based foundation model for brain functional connectivity network. *Pattern Recognition*, 169:111988, 2026. ISSN 0031-3203. doi: <https://doi.org/10.1016/j.patcog.2025.111988>. URL <https://www.sciencedirect.com/science/article/pii/S003132032500648X>.
- [3] Ashish Vaswani, Noam Shazeer, Niki Parmar, Jakob Uszkoreit, Llion Jones, Aidan N. Gomez, Lukasz Kaiser, and Illia Polosukhin. Attention is all you need, 2023. URL <https://arxiv.org/abs/1706.03762>.
- [4] Kaiming He, Xinlei Chen, Saining Xie, Yanghao Li, Piotr Dollár, and Ross B. Girshick. Masked autoencoders are scalable vision learners. *CoRR*, abs/2111.06377, 2021. URL <https://arxiv.org/abs/2111.06377>.
- [5] Siyi Tang, Jared A. Dunnmon, Khaled Saab, Xuan Zhang, Qianying Huang, Florian Dubost, Daniel L. Rubin, and Christopher Lee-Messer. Self-supervised graph neural networks for improved electroencephalographic seizure analysis, 2022. URL <https://arxiv.org/abs/2104.08336>.
- [6] Sudip Das, Pankaj Pandey, and Krishna Prasad Miyapuram. Improving self-supervised pretraining models for epileptic seizure detection from eeg data, 2022. URL <https://arxiv.org/abs/2207.06911>.
- [7] Josue Ortega Caro, Antonio H. de O. Fonseca, Christopher Averill, Syed A. Rizvi, Matteo Rosati, James L. Cross, Prateek Mittal, Emanuele Zappala, Daniel Levine, Rahul M. Dhodapkar, Insu Han, Amin Karbasi, Chadi G. Abdallah, and David van Dijk. Brainlm: A foundation model for brain activity recordings. *bioRxiv*, 2024. doi: 10.1101/2023.09.12.557460. URL <https://www.biorxiv.org/content/early/2024/01/13/2023.09.12.557460>.
- [8] Zijian Dong, Ruilin Li, Yilei Wu, Thuan Tinh Nguyen, Joanna Su Xian Chong, Fang Ji, Nathanael Ren Jie Tong, Christopher Li Hsian Chen, and Juan Helen Zhou. Brain-jepa: Brain dynamics foundation model with gradient positioning and spatiotemporal masking, 2024. URL <https://arxiv.org/abs/2409.19407>.
- [9] Yinchu Zhou, Peiyu Duan, Yuexi Du, and Nicha C. Dvornek. Self-supervised pre-training tasks for an fmri time-series transformer in autism detection. *Machine learning in clinical neuroimaging : 7th international workshop, MLCN 2024, held in conjunction with MICCAI 2024, Marrakesh, Morocco, October 10, 2024, proceedings. MLCN (Workshop)*, 15266:145–154, 2024. URL <https://api.semanticscholar.org/CorpusID:272753620>.
- [10] Cheng Wang, Yu Jiang, Zhihao Peng, Chenxin Li, Changbae Bang, Lin Zhao, Jinglei Lv, Jorge Sepulcre, Carl Yang, Lifang He, Tianming Liu, Daniel Barron, Quanzheng Li, Randy Hirschtick, Byung-Hoon Kim, Xiang Li, and Yixuan Yuan. Towards a general-purpose foundation model for fmri analysis, 2025. URL <https://arxiv.org/abs/2506.11167>.
- [11] Edmund T. Rolls, Chu-Chung Huang, Ching-Po Lin, Jianfeng Feng, and Marc Joliot. Automated anatomical labelling atlas 3. *NeuroImage*, 206:116189, 2020. ISSN 1053-8119. doi: <https://doi.org/10.1016/j.neuroimage.2019.116189>. URL <https://www.sciencedirect.com/science/article/pii/S1053811919307803>.
- [12] The ADHD-200 Consortium. A model to advance the translational potential of neuroimaging in clinical neuroscience. [http://fcon\\_1000.projects.nitrc.org/indi/adhd200/](http://fcon_1000.projects.nitrc.org/indi/adhd200/), 2011. Accessed: 2025-08-18.
- [13] Heledd Hart, Joaquim Radua, David Mataix-Cols, and Katya Rubia. Meta-analysis of fmri studies of timing in attention-deficit hyperactivity disorder (adhd). *Neuroscience & Biobehavioral Reviews*, 36(10):2248–2256, 2012.

- 229 [14] Eve M. Valera, Rebecca M.C. Spencer, Thomas A. Zeffiro, Nikos Makris, Thomas J. Spencer,  
230 Stephen V. Faraone, Joseph Biederman, and Larry J. Seidman. Neural substrates of impaired  
231 sensorimotor timing in adult attention-deficit/hyperactivity disorder. *Biological Psychiatry*,  
232 68(4):359–367, 2010. ISSN 0006-3223. doi: <https://doi.org/10.1016/j.biopsych.2010.05.012>.  
233 URL <https://www.sciencedirect.com/science/article/pii/S0006322310004725>.  
234 Rare Gene Variants in Neurodevelopmental Disorders.
- 235 [15] Michal Goetz, Marie Vesela, and Radek Ptacek. Notes on the role of the cerebellum in adhd.  
236 *Austin J Psychiatry Behav Sci*, 1, 04 2014.
- 237 [16] Lyle J Palmer. Uk biobank: bank on it. *The Lancet*, 369(9578):1980–1982, 2007. ISSN  
238 0140-6736. doi: [https://doi.org/10.1016/S0140-6736\(07\)60924-6](https://doi.org/10.1016/S0140-6736(07)60924-6). URL <https://www.sciencedirect.com/science/article/pii/S0140673607609246>.  
239
- 240 [17] B.J. Casey, Tariq Cannonier, May I. Conley, Alexandra O. Cohen, Deanna M. Barch, Mary M.  
241 Heitzeg, Mary E. Soules, Theresa Teslovich, Danielle V. Dellarco, Hugh Garavan, Catherine A.  
242 Orr, Tor D. Wager, Marie T. Banich, Nicole K. Speer, Matthew T. Sutherland, Michael C.  
243 Riedel, Anthony S. Dick, James M. Bjork, Kathleen M. Thomas, Bader Chaarani, Margie H.  
244 Mejia, Donald J. Hagler, M. Daniela Cornejo, Chelsea S. Sicat, Michael P. Harms, Nico U.F.  
245 Dosenbach, Monica Rosenberg, Eric Earl, Hauke Bartsch, Richard Watts, Jonathan R. Polimeni,  
246 Joshua M. Kuperman, Damien A. Fair, and Anders M. Dale. The adolescent brain cognitive  
247 development (abcd) study: Imaging acquisition across 21 sites. *Developmental Cognitive*  
248 *Neuroscience*, 32:43–54, 2018. ISSN 1878-9293. doi: <https://doi.org/10.1016/j.dcn.2018.03.001>.  
249 URL <https://www.sciencedirect.com/science/article/pii/S1878929317301214>.  
250 The Adolescent Brain Cognitive Development (ABCD) Consortium: Rationale, Aims, and  
251 Assessment Strategy.
- 252 [18] David C. Van Essen, Stephen M. Smith, Deanna M. Barch, Timothy E.J. Behrens, Essa Yacoub,  
253 and Kamil Ugurbil. The wu-minn human connectome project: An overview. *NeuroImage*,  
254 80:62–79, 2013. ISSN 1053-8119. doi: <https://doi.org/10.1016/j.neuroimage.2013.05.041>.  
255 URL <https://www.sciencedirect.com/science/article/pii/S1053811913005351>.  
256 Mapping the Connectome.
- 257 [19] Albert Gu and Tri Dao. Mamba: Linear-time sequence modeling with selective state spaces,  
258 2024. URL <https://arxiv.org/abs/2312.00752>.
- 259 [20] Ze Liu, Yutong Lin, Yue Cao, Han Hu, Yixuan Wei, Zheng Zhang, Stephen Lin, and Baining  
260 Guo. Swin transformer: Hierarchical vision transformer using shifted windows, 2021. URL  
261 <https://arxiv.org/abs/2103.14030>.
